# Supplementary material for: Enhancement of Osteoblastic-Like Cell Activity by Glow Discharge Plasma Surface Modified Hydroxyapatite/β-Tricalcium Phosphate Bone Substitute
Source: MDPI journal article supplement (doi:10.3390/ma10121347), 2017-11-23
Supplement: s1 [file s1]

Supplementary Information

# Enhancement of Osteoblastic-Like Cell Activity by Glow Discharge Plasma Surface Modified Hydroxyapatite/ $\beta$ -Tricalcium Phosphate Bone Substitute

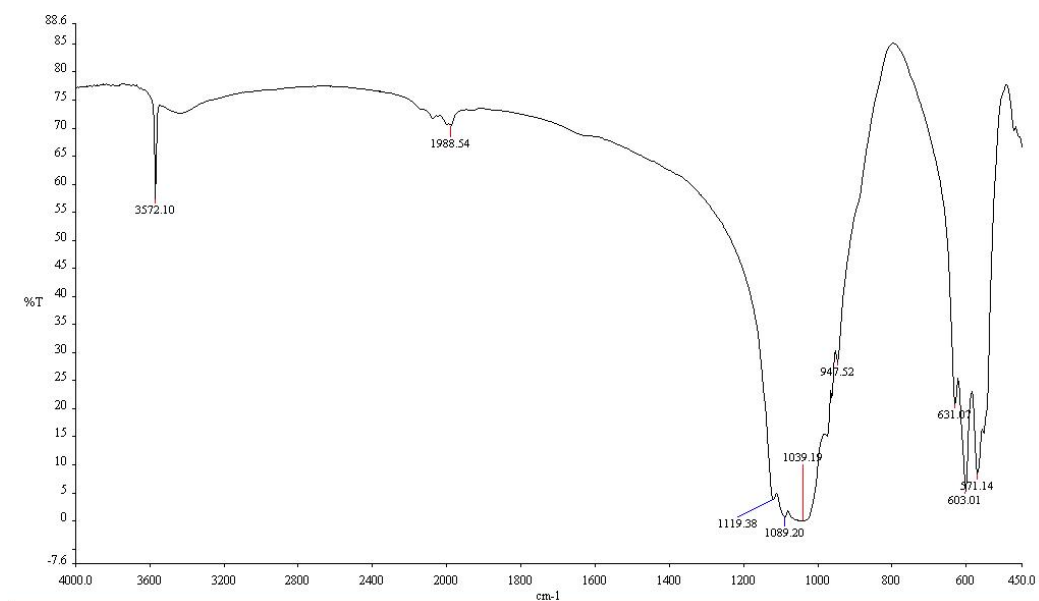

(A)

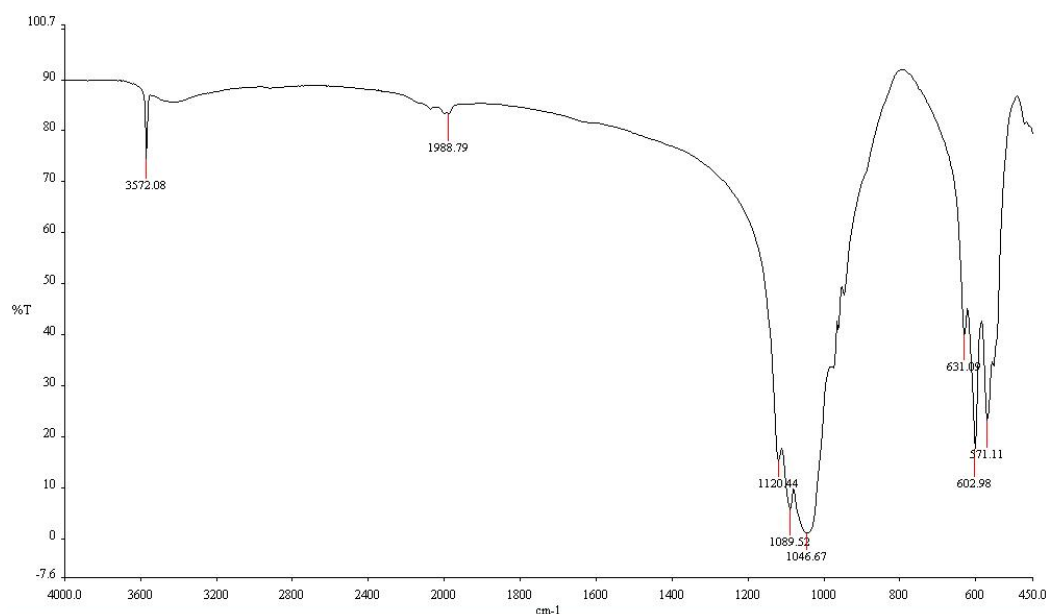

(B)

**Figure S1:** Fourier Transform Infrared Spectra (FTIR) for (A) HA/ $\beta$ -TCP and (B) HA/ $\beta$ -TCP+Ar-GDP.

In the IR spectra, peaks at 3570  $\text{cm}^{-1}$ , 1040  $\text{cm}^{-1}$ , and 570–601  $\text{cm}^{-1}$  can be assigned to

stretching vibrations involving OH-, PO<sub>4</sub><sup>3-</sup>, and CO<sub>3</sub><sup>2-</sup> moieties in the HAP lattice. There were no significant difference in peaks between (A) HA/β-TCP and (B) HA/β-TCP+Ar-GDP.

## Reference

- 1 Liga Berzina-Cimdina and Natalija Borodajenko. Research of Calcium Phosphates Using Fourier Transform Infrared Spectroscopy, Infrared Spectroscopy - Materials Science, Engineering and Technology. Prof. Theophanides Theophile Ed., InTech, Shanghai, China, 2012, Chapter 6.
